# Supplementary material
Source: PubMed Central journal article supplement (PMC2141816)

122°30'

122°15'

122°00'

37°45'

37°30'

*Pacific Ocean*

*Central  
Bay*

*San  
Francisco  
Bay*

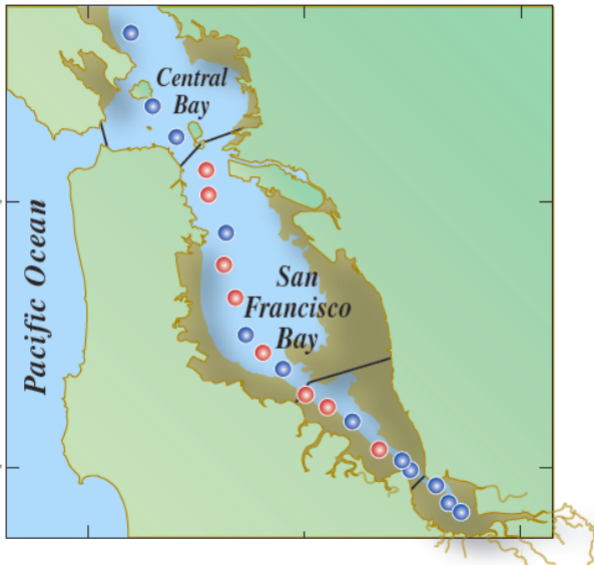

Supplement: pnas_0706151104_1.pdf [file pnas_0706151104_1.pdf]

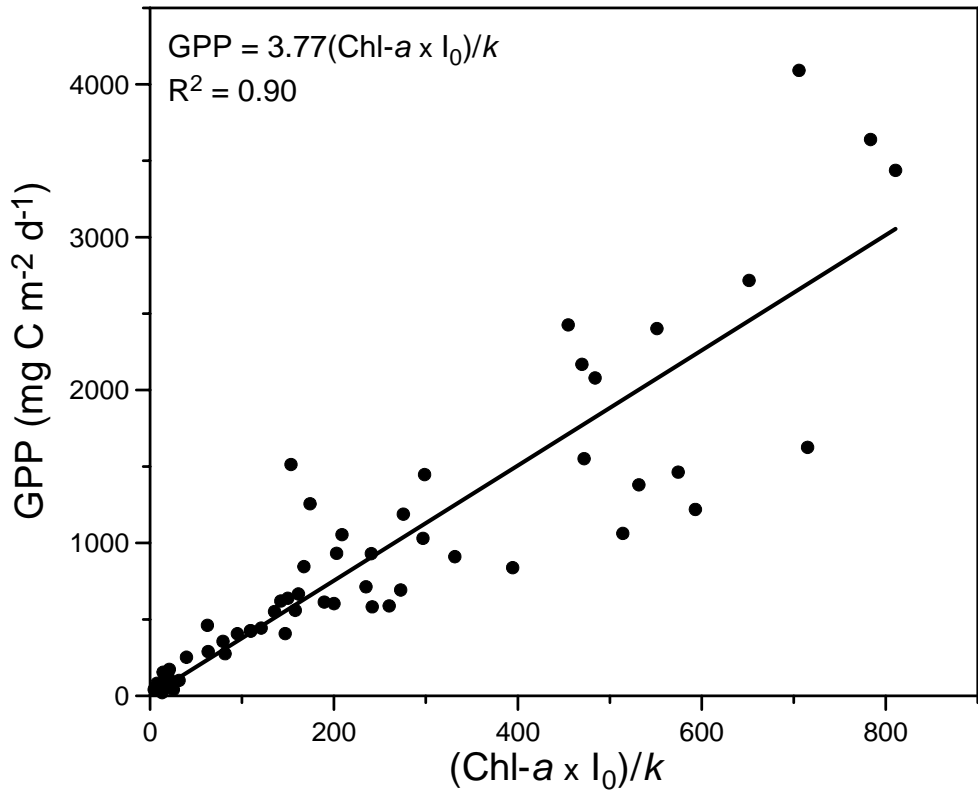

Supplement: pnas_0706151104_2.pdf [file pnas_0706151104_2.pdf]

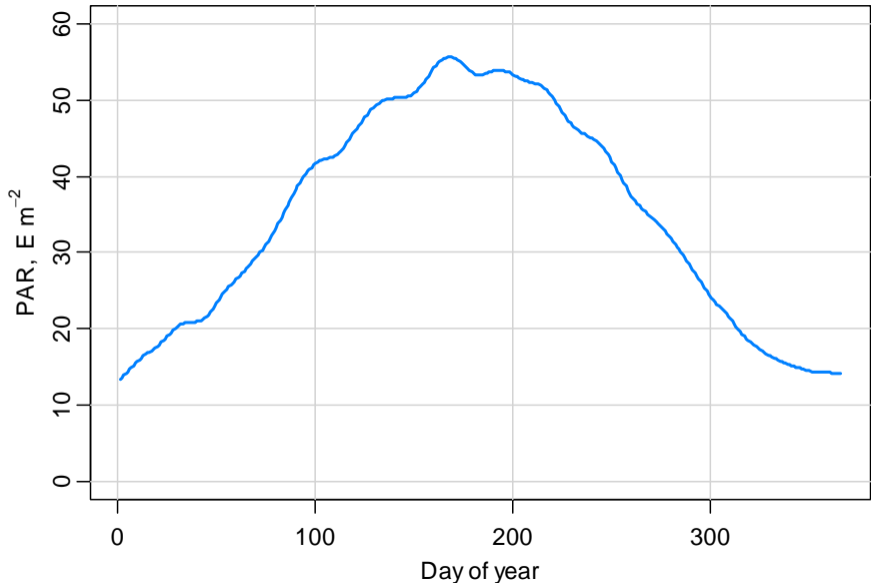

Supplement: pnas_0706151104_3.pdf [file pnas_0706151104_3.pdf]
